# Supplementary material
Source: PubMed Central journal article supplement (PMC3583335)
Supplement: SD2.pdf [file SD2.pdf]

SUPPLEMENTAL TABLE S1

Children with the highest quartile measure of intestinal inflammation in an asymptomatic stool as measured by AAT, MPO, or NEO\*

|                                      | Coefficient<br>(95% CI) |                          | Coefficient<br>(95% CI) |                          | Coefficient<br>(95% CI) |
|--------------------------------------|-------------------------|--------------------------|-------------------------|--------------------------|-------------------------|
| AAT < 25th percentile                | Ref                     | MPO < 25th percentile    | Ref                     | NEO < 25th percentile    | Ref                     |
| AAT 25th–75th percentile             | –0.267†                 | MPO 25th–75th percentile | –0.273‡                 | NEO 25th–75th percentile | –0.173                  |
| AAT > 75th percentile                | –0.398‡                 | MPO > 75th percentile    | –0.658‡                 | NEO > 75th percentile    | –0.457‡                 |
| Diarrheal incidence                  | –0.068†                 | Diarrheal incidence      | –0.084‡                 | Diarrheal incidence      | –0.073                  |
| Country§                             | –                       | Country§                 | –                       | Country§                 | –                       |
| Age§                                 | –                       | Age§                     | –                       | Age§                     | –                       |
| Constant                             | 9.919‡                  | Constant                 | 9.924‡                  | Constant                 | 9.756‡                  |
| <i>N</i> (number of samples)         | 928                     | <i>N</i>                 | 752                     | <i>N</i>                 | 790                     |
| <i>n</i> (number of unique children) | 537                     | <i>n</i>                 | 472                     | <i>n</i>                 | 495                     |

\* Experienced significant deficits in linear growth as measured by change in length over the subsequent 6-month time interval when compared with children in the lowest quartile of these measures. For instance, children in the upper quartile of concentration of MPO grow 0.66 cm less over the subsequent 6-month period than children with fecal MPO values in the lowest quartile.

†  $P < 0.050$ .

‡  $P < 0.01$ .

§ Coefficients not shown.

AAT = alpha-anti-trypsin; MPO = myeloperoxidase; NEO = neopterin; CI = confidence interval.

SUPPLEMENTAL TABLE S2

The EE activity index is associated with linear growth failure over a subsequent 6-month time interval\*

|                                      | Coefficient<br>(95% CI) |
|--------------------------------------|-------------------------|
| Score                                | –0.108†                 |
| Diarrheal incidence                  | –0.066‡                 |
| Country = BG                         | Ref                     |
| BR                                   | 1.916†                  |
| IN                                   | –0.139                  |
| NP                                   | 0.658†                  |
| PE                                   | –0.191                  |
| PK                                   | 0.159                   |
| SA                                   | 1.706†                  |
| TAZ                                  | –0.280                  |
| Age = 3 months                       | Ref                     |
| 6 months                             | –2.774†                 |
| 9 months                             | –4.020†                 |
| Constant                             | 10.257†                 |
| <i>N</i> (number of samples)         | 624                     |
| <i>n</i> (number of unique children) | 408                     |

\* For every additional point on a 10-point scale the change in LAZ over the 6-month interval is diminished by 0.108 cm. Therefore, a child with an EE activity score of 10 measures of AAT, MPO, and NEO all in the upper quartile will have a change length of 1.08 cm less than a child with markers of intestinal inflammation in the lowest quartile for each marker of intestinal inflammation.

†  $P < 0.01$ .

‡  $P < 0.050$ .

CI = confidence interval; BG = Bangladesh; BR = Brazil; IN = India; NP = Nepal; PE = Peru; PK = Pakistan; SA = South Africa; TZ = Tanzania.
